# Supplementary material
Source: MDPI journal article supplement (https://www.mdpi.com/2072-4292/12/6/1017)
Supplement: s1 [file s1]

## Supplementary Materials

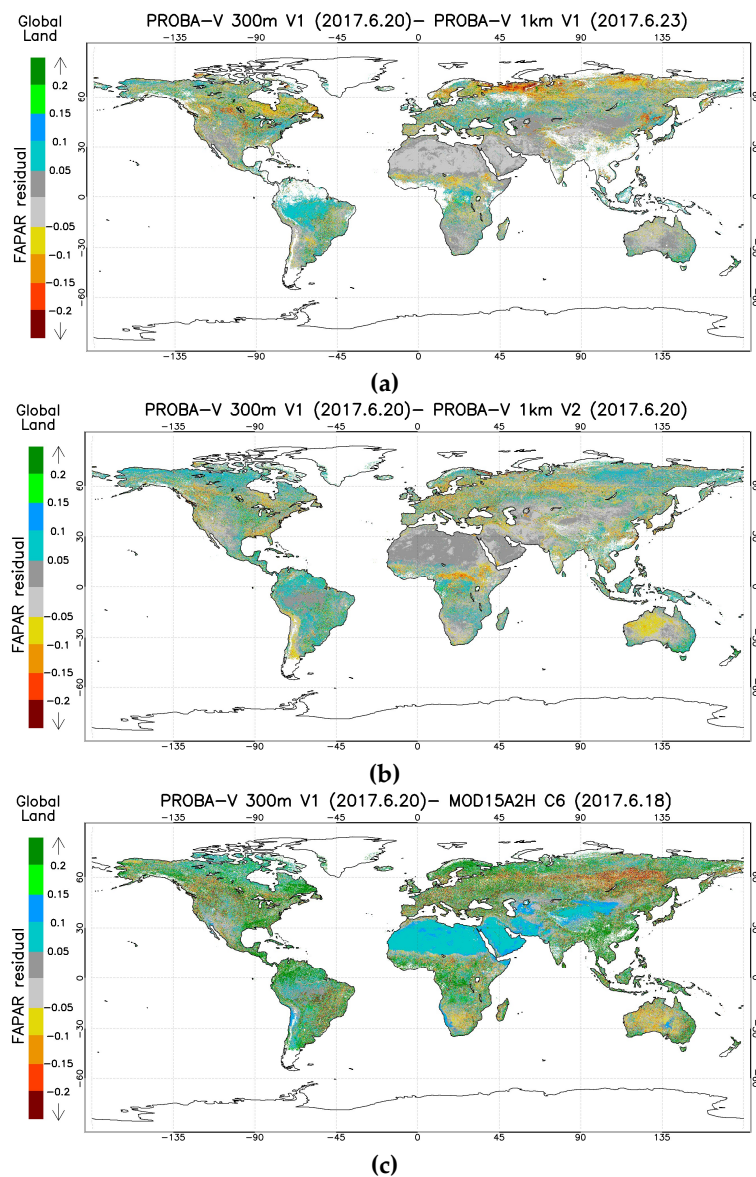

**Figure S1.** fAPAR residual map between PROBA-V Collection 300 m and Collection 1 km V1 (a), Collection 1 km V2 (b) and MODIS C6 (c) for 20th June 2017.

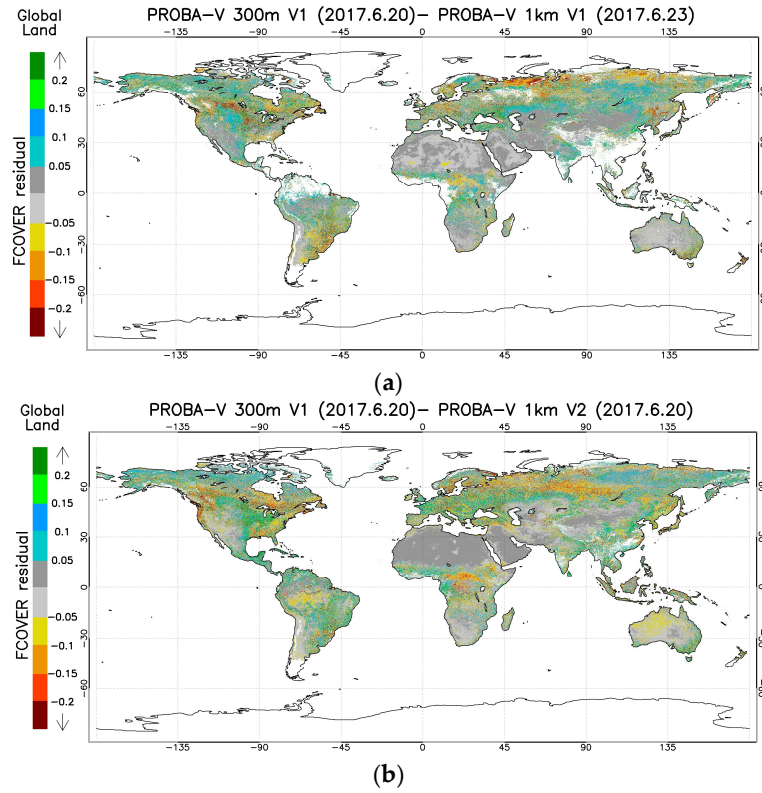

**Figure S2.** fCOVER residual map between PROBA-V Collection 300 m and Collection 1 km V1 (a) and Collection 1 km V2 (b) for 20th June 2017.

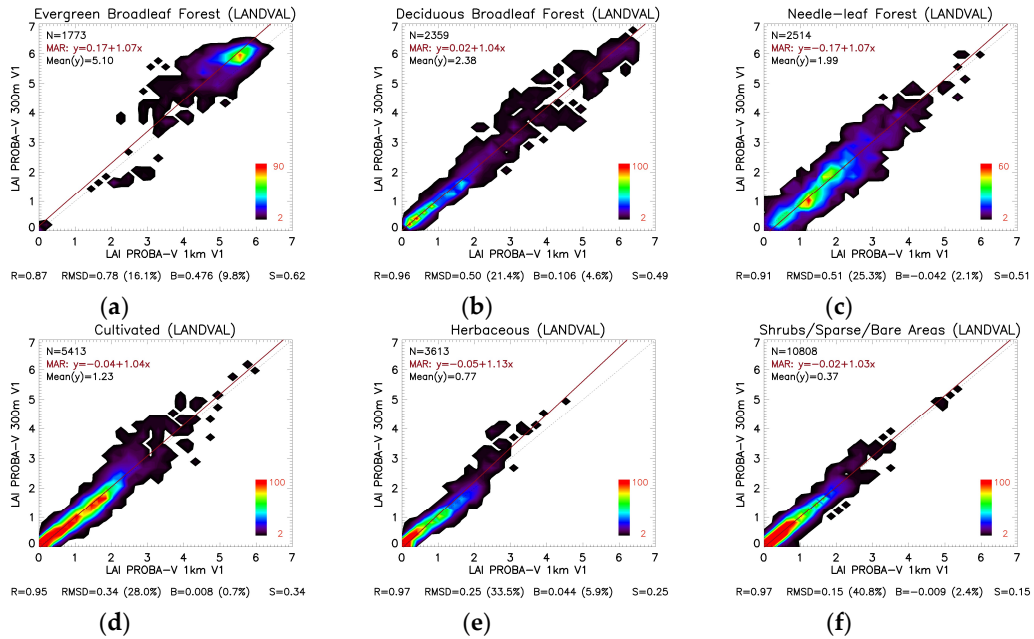

**Figure S3.** LAI PROBA-V 300 m versus PROBA-V 1 km V1 scatterplots for the 2016–2017 period over LANDVAL sites corresponding to evergreen broadleaved forest (a), deciduous broadleaved forest (b), needle-leaf forest (c), cultivated (d), herbaceous (e) and bare areas (f).

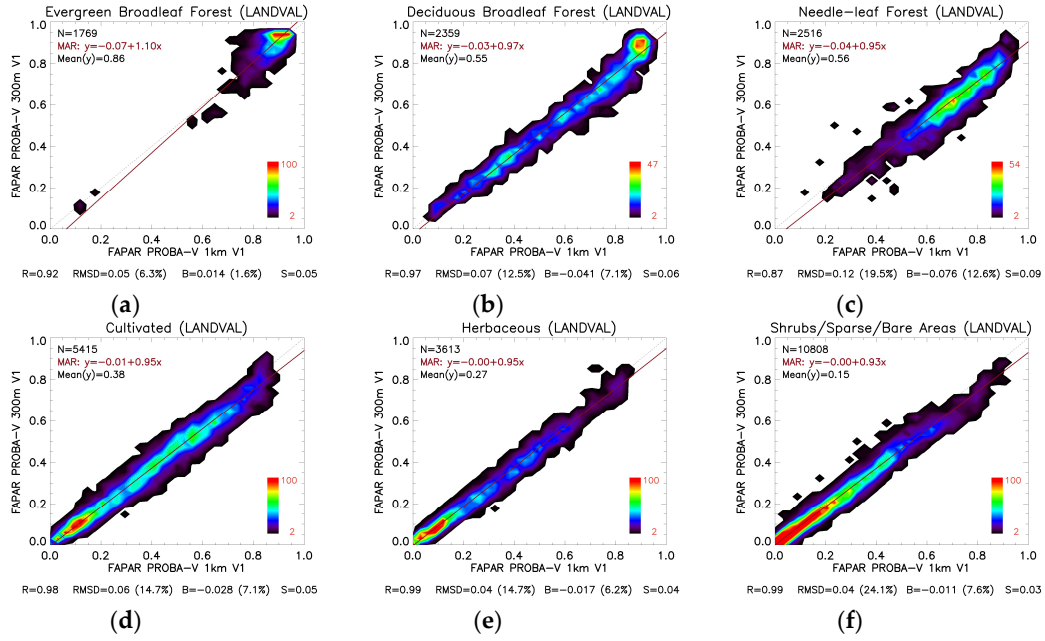

**Figure S4.** fAPAR PROBA-V 300 m versus PROBA-V 1 km V1 scatterplots for the 2016–2017 period over LANDVAL sites corresponding to evergreen broadleaved forest (a), deciduous broadleaved forest (b), needle-leaf forest (c), cultivated (d), herbaceous (e) and bare areas (f).

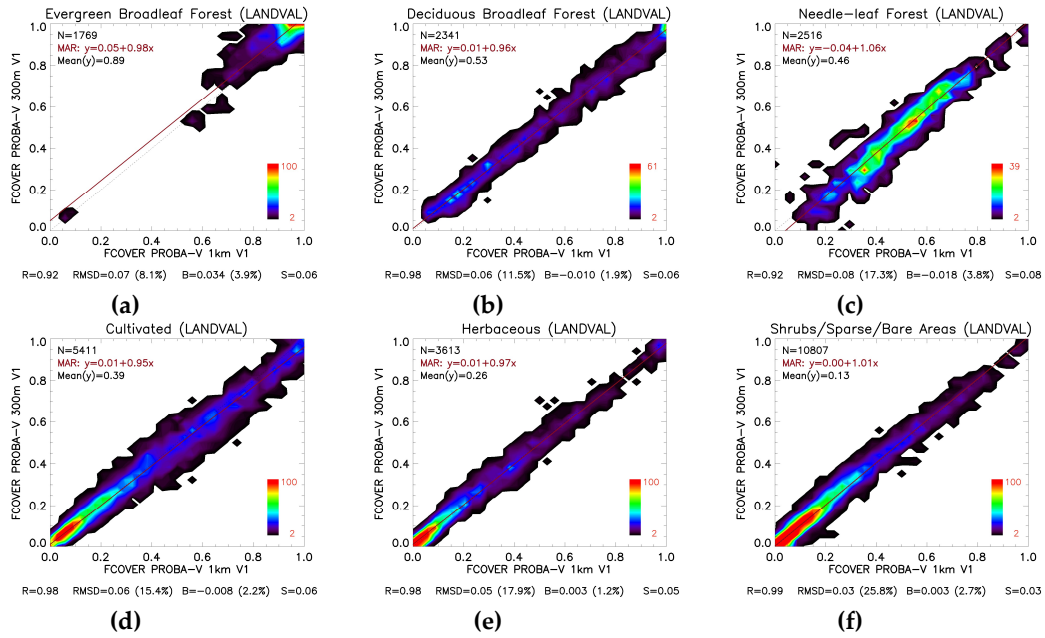

**Figure S5.** fCOVER PROBA-V 300 m versus PROBA-V 1 km V1 scatterplots for the 2016–2017 period over LANDVAL sites corresponding to evergreen broadleaved forest (a), deciduous broadleaved forest (b), needle-leaf forest (c), cultivated (d), herbaceous (e) and bare areas (f).

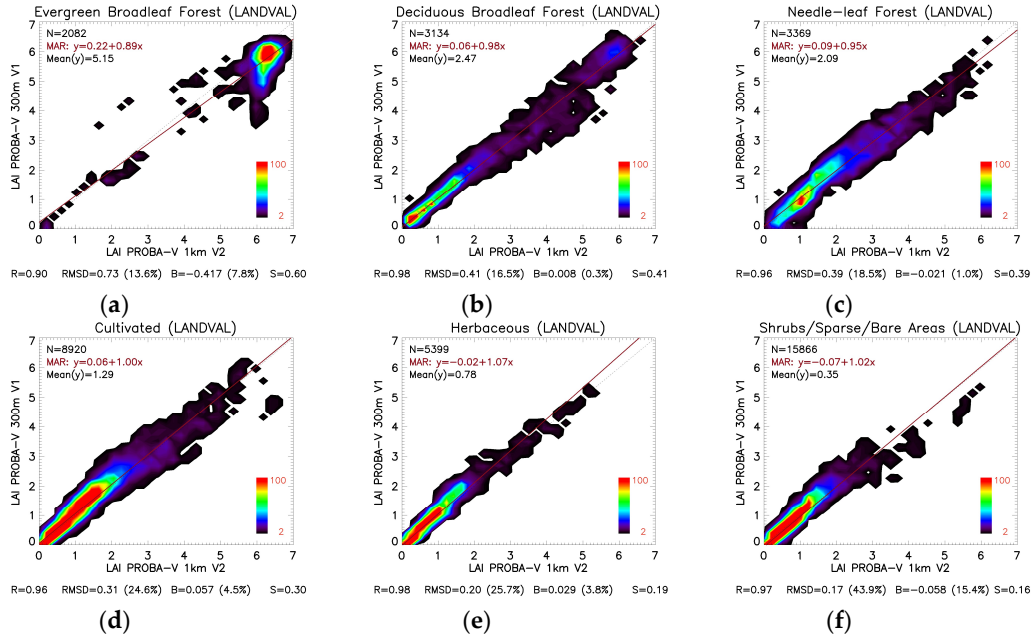

**Figure S6.** LAI PROBA-V 300 m versus PROBA-V 1 km V2 scatterplots for the 2016–2017 period over LANDVAL sites corresponding to evergreen broadleaved forest (a), deciduous broadleaved forest (b), needle-leaf forest (c), cultivated (d), herbaceous (e) and bare areas (f).

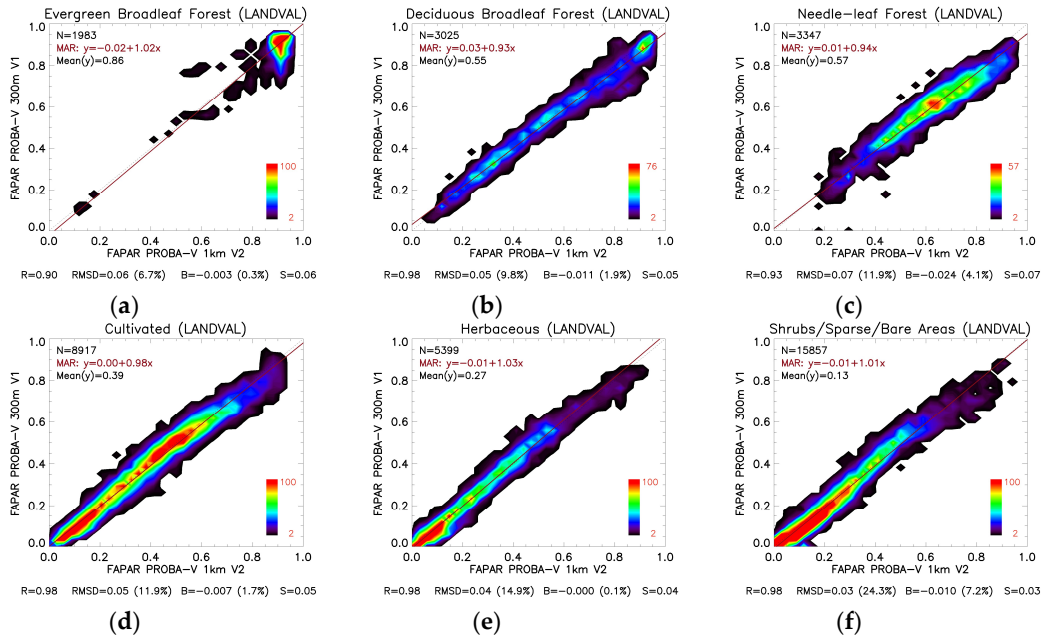

**Figure S7.** fAPAR PROBA-V 300 m versus PROBA-V 1 km V2 scatterplots for the 2016–2017 period over LANDVAL sites corresponding to evergreen broadleaved forest (a), deciduous broadleaved forest (b), needle-leaf forest (c), cultivated (d), herbaceous (e) and bare areas (f).



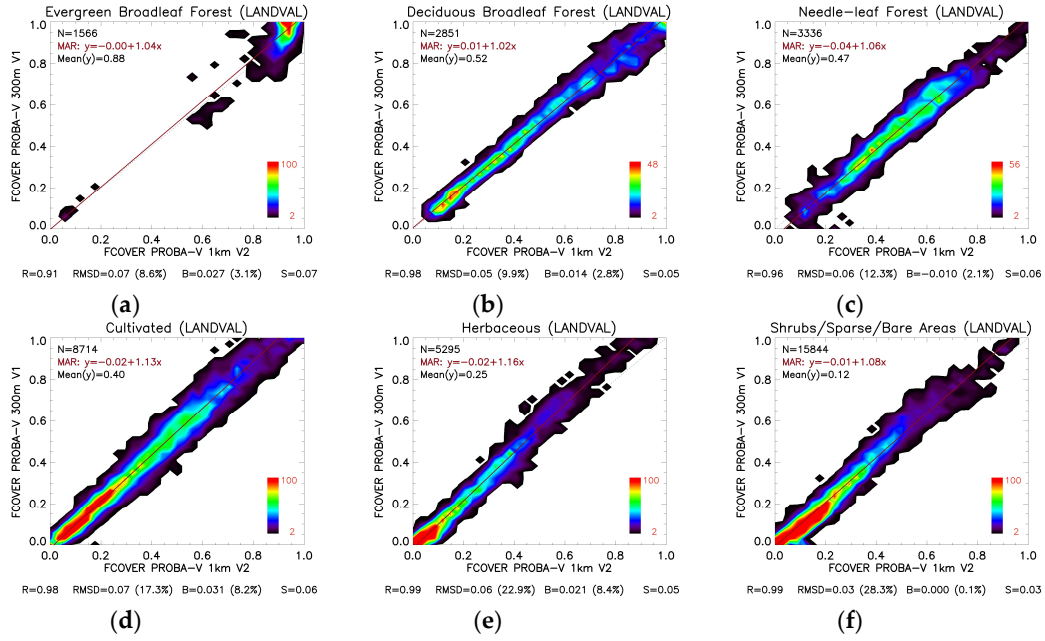

**Figure S8.** fCOVER PROBA-V 300 m versus PROBA-V 1 km V2 scatterplots for the 2016–2017 period over LANDVAL sites corresponding to evergreen broadleaved forest (a), deciduous broadleaved forest (b), needle-leaf forest (c), cultivated (d), herbaceous (e) and bare areas (f).

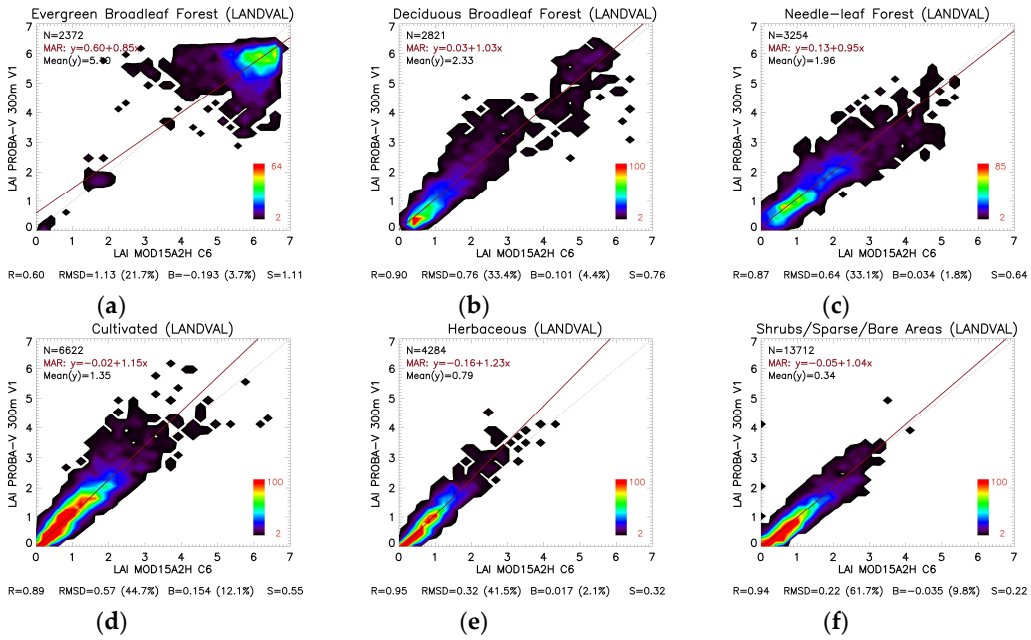

**Figure S9.** LAI PROBA-V 300 m versus MOD15A2H C6 scatterplots for the 2016–2017 period over LANDVAL sites corresponding to evergreen broadleaved forest (a), deciduous broadleaved forest (b), needle-leaf forest (c), cultivated (d), herbaceous (e) and bare areas (f).

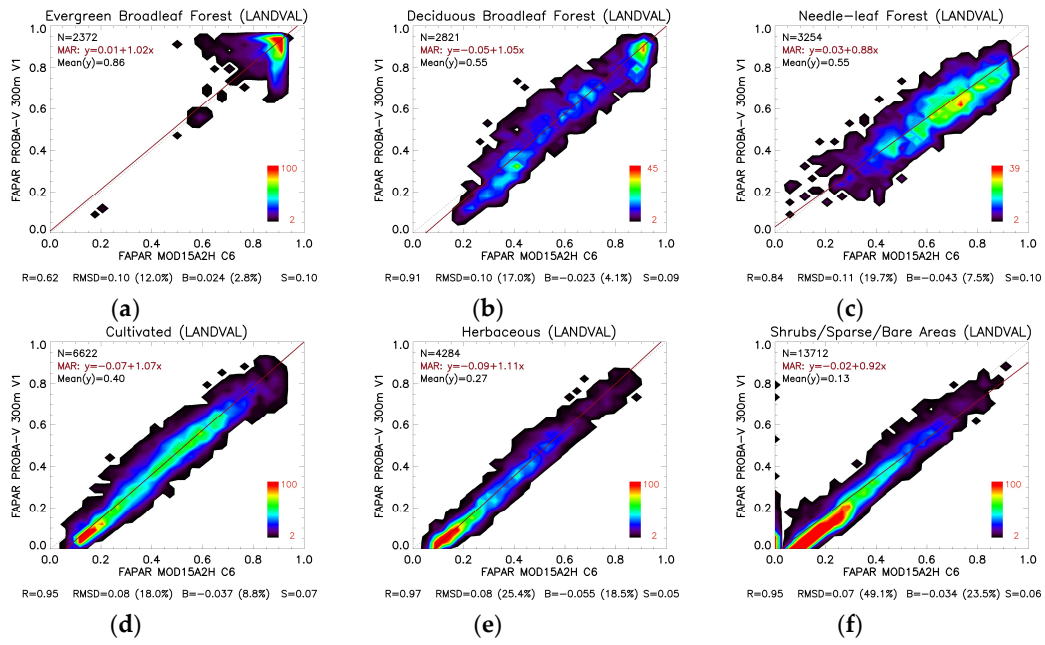

**Figure S10.** fAPAR PROBA-V 300 m versus MOD15A2H C6 scatterplots for the 2016–2017 period over LANDVAL sites corresponding to evergreen broadleaved forest (a), deciduous broadleaved forest (b), needle-leaf forest (c), cultivated (d), herbaceous (e) and bare areas (f).
